# Supplementary material for: Adapting a Physical Earthquake-Aftershock Model to Simulate the Spread of COVID-19
Source: MDPI journal article supplement (doi:10.3390/ijerph192416527), 2022-12-09
Supplement: s1 [file s1]

Supplementary Information for ‘Adapting a physical  
earthquake-aftershock model to simulate the spread of  
COVID19’

Thanushika Gunatilake and Stephen A. Miller

| Country     | Website                                                                     | Link                                                                                                              |
|-------------|-----------------------------------------------------------------------------|-------------------------------------------------------------------------------------------------------------------|
| Austria     | Statistik Austria - Die Informationsmanger                                  | <a href="https://www.statistik.at/atlas">https://www.statistik.at/atlas</a>                                       |
| Belgium     | Statbel, the Belgian statistical office                                     | <a href="https://statbel.fgov.be/en">https://statbel.fgov.be/en</a>                                               |
| Brazil      | Instituto Brasileiro de Geografia e Estatística                             | <a href="https://cidades.ibge.gov.br/brasil">https://cidades.ibge.gov.br/brasil</a>                               |
| France      | Insee - National Institute of Statistics and Economic Studies               | <a href="https://www.insee.fr/en/accueil">https://www.insee.fr/en/accueil</a>                                     |
| Germany     | Statistische Ämter des Bundes und der Länder<br>Gemeinsames Statistikportal | <a href="https://www.statistikportal.de/de">https://www.statistikportal.de/de</a>                                 |
| Italy       | Istat Statistics                                                            | <a href="https://www.istat.it/en/">https://www.istat.it/en/</a>                                                   |
| Melbourne   | Research and statistics - City of Melbourne                                 | <a href="https://www.melbourne.vic.gov.au">https://www.melbourne.vic.gov.au</a>                                   |
| New Zealand | Stats New Zealand                                                           | <a href="https://www.stats.govt.nz">https://www.stats.govt.nz</a>                                                 |
| Spain       | INE- National Statistics Institute. Spain                                   | <a href="https://www.ine.es/en/">https://www.ine.es/en/</a>                                                       |
| Sweden      | Statistics Sweden                                                           | <a href="https://www.scb.se/en/">https://www.scb.se/en/</a>                                                       |
| Switzerland | Bundesamt für Statistik-<br>Statistischer Atlas der Schweiz                 | <a href="https://www.atlas.bfs.admin.ch/maps">https://www.atlas.bfs.admin.ch/maps</a>                             |
| UK          | Research and statistics - GOV.UK                                            | <a href="https://www.gov.uk/search/research-and-statistics">https://www.gov.uk/search/research-and-statistics</a> |
| USA         | United States Census Bureau                                                 | <a href="https://www.census.gov">https://www.census.gov</a>                                                       |

Table S1. Sources used in this study.

Supplementary Figure S1

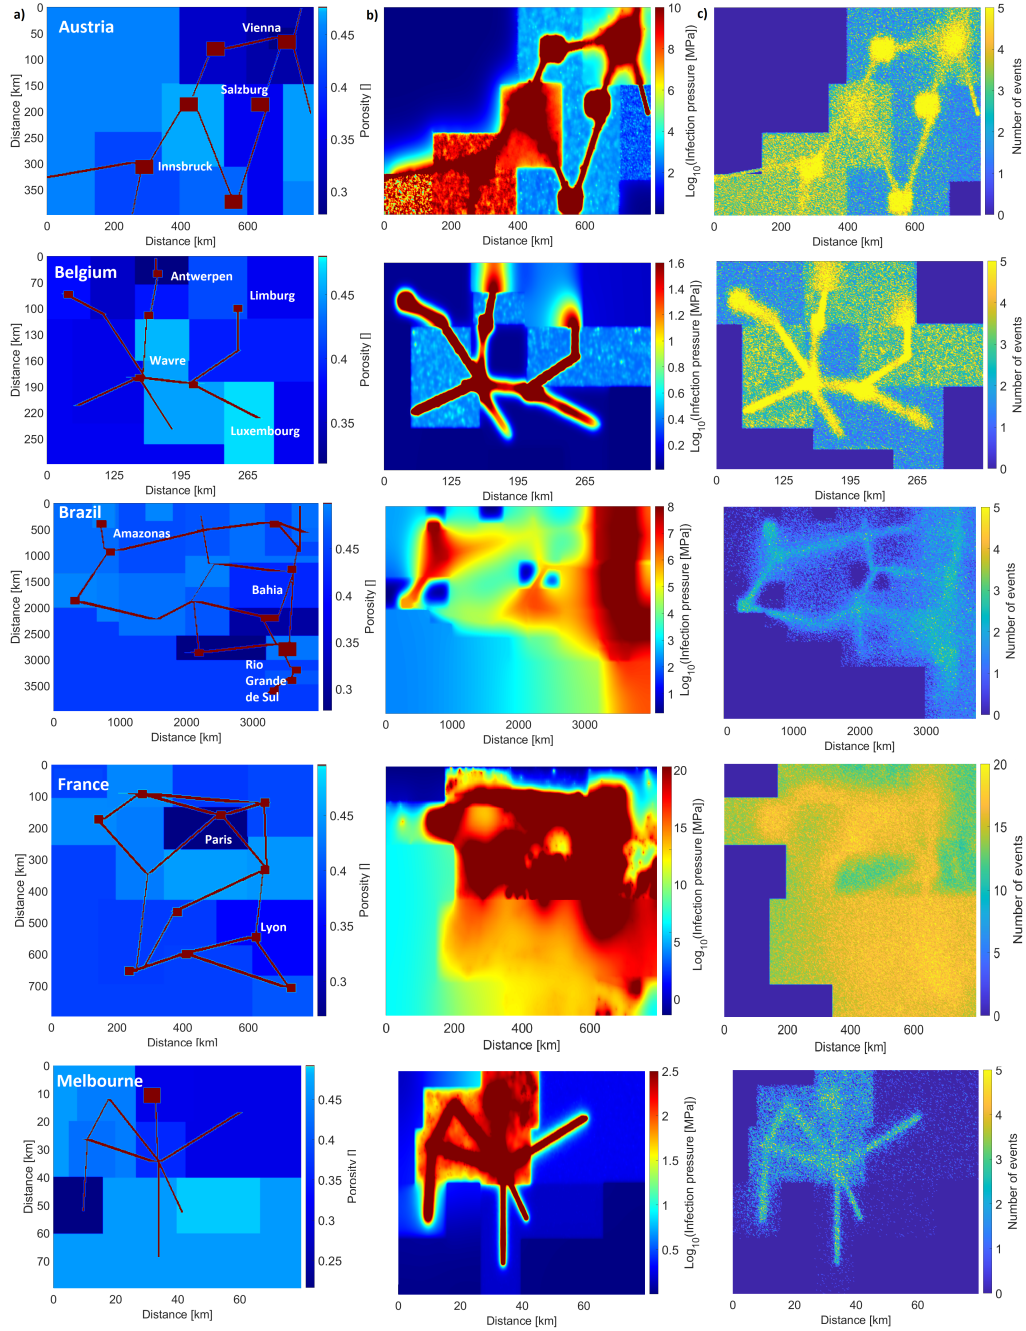

Figure S1: a) Model setup for Austria, Belgium, Brazil, France and Melbourne showing the source locations (red) signifying airports and intercity rail lines, and the various shades of blue scale with population density and delineate federal states. b) Calculated infection pressure at the end of the simulation. Note change in scale bar for each country. c) The number of repeated infections calculated in the model highlights the most affected regions and shows how elevated infection pressures (Figure 1 b) continue to generate model infections.

Supplementary Figure S2

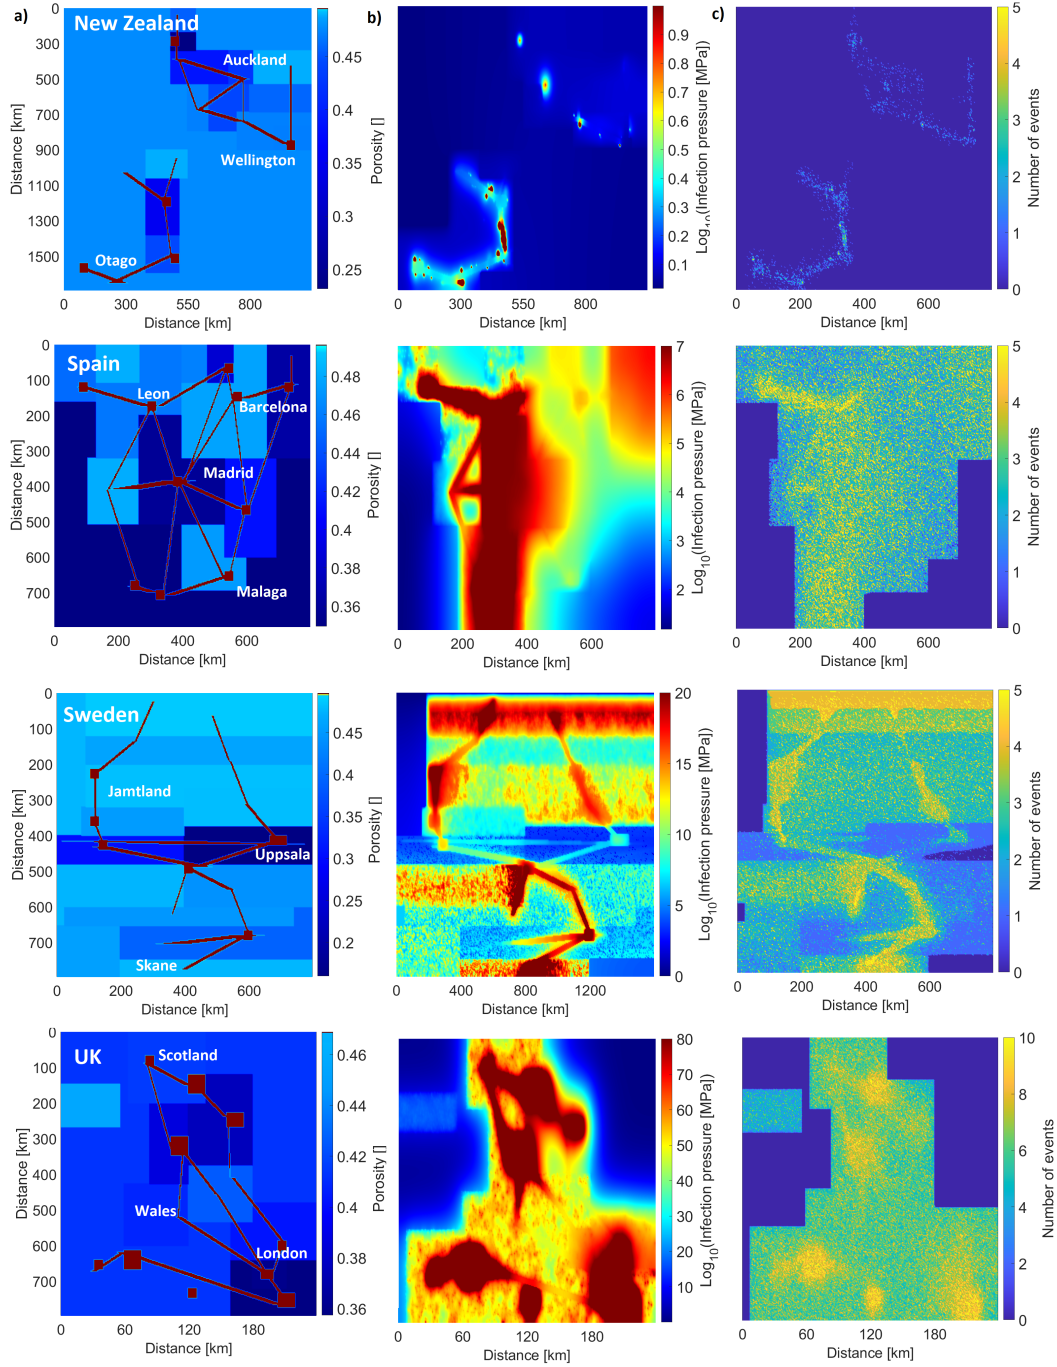

Figure S2: a) Model setup for New Zealand, Spain, Sweden and the UK showing the source locations (red) signifying airports and intercity rail lines, and the various shades of blue scale with population density and delineate federal states. b) Calculated infection pressure at the end of the simulation. Note change in scale bar for each country. c) The number of repeated infections calculated in the model highlights the most affected regions and shows how elevated infection pressures (Figure 2 b) continue to generate model infections.



Supplementary Figure S3

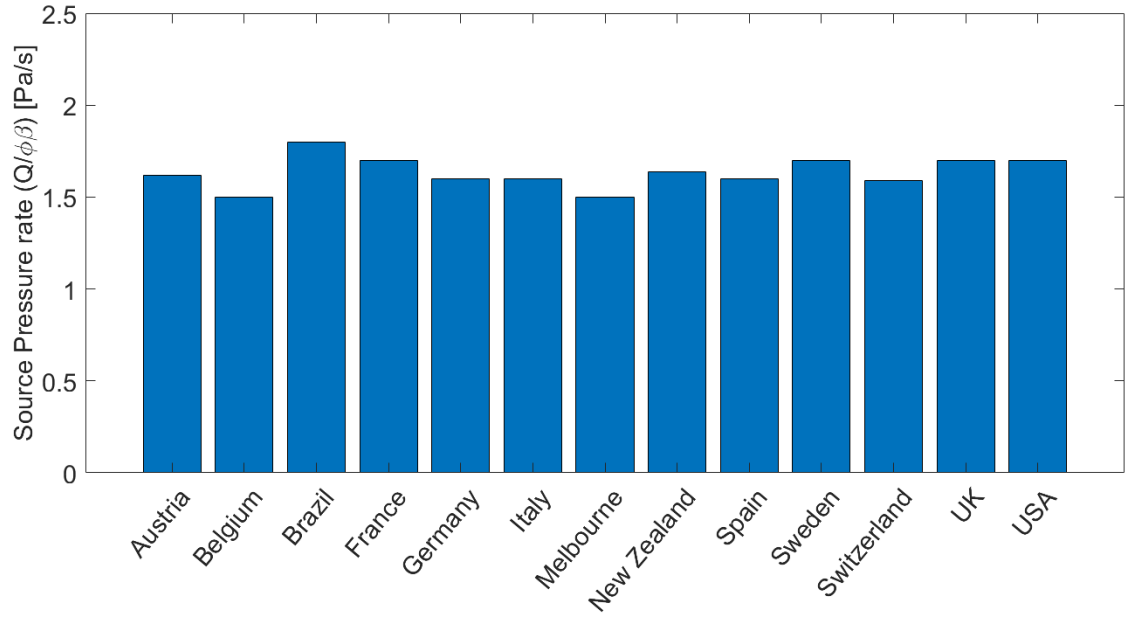

Figure S3: Average initial source pressure rate for each studied case.

Supplementary Figure S4

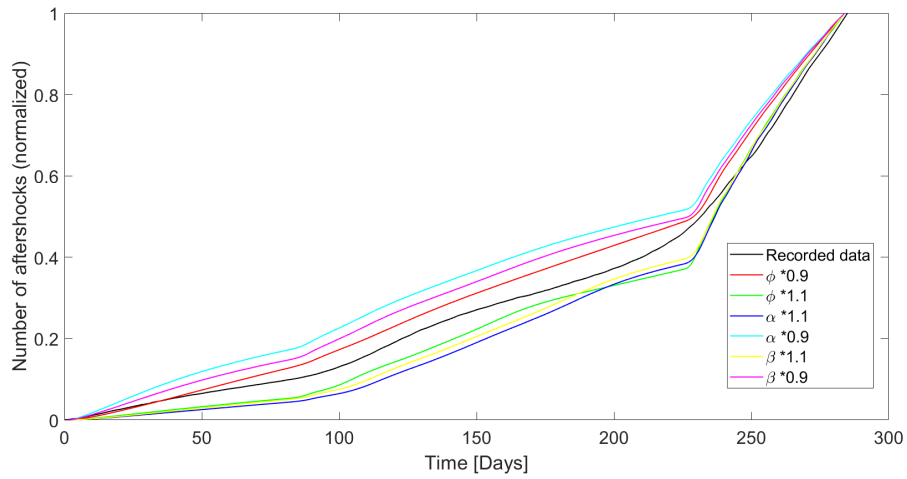

Figure S4: Results with parameter variation for the study case USA. Model results varying  $\alpha$ , porosity ( $\phi$ ), and compressibility ( $\beta$ ) by plus or minus 10% showing poor comparisons with data, demonstrating further tight constraints on model parameters.

| Country     | Difference |
|-------------|------------|
| Italy       | -0.9%      |
| Germany     | -3%        |
| Switzerland | -0.1%      |
| Spain       | -3%        |
| UK          | -1%        |
| USA         | -0.7%      |
| Austria     | -0.9%      |
| France      | -0.2%      |
| Brazil      | -0.5%      |
| Sweden      | -0.5%      |
| Belgium     | -0.9%      |
| New Zealand | -0.05%     |
| Melbourne   | -0.1%      |

Table S2: Difference between model and observations averaged for the entire record (in percent) for parameter  $\alpha$ . We estimate errors by comparing, point for point, the difference between the (normalized) observed cumulative infections, with the (normalized) cumulative model infections. We then take the average of these differences for the entire record.
